# Supplementary material
Source: PubMed Central journal article supplement (PMC9812288)
Supplement: NEJMc2214293_appendix.pdf [file NEJMc2214293_appendix.pdf]

## Supplementary Appendix

Supplement to: Davis-Gardner ME, Lai L, Wali B, et al. Neutralization against BA.2.75.2, BQ.1.1, and XBB from mRNA bivalent booster. *N Engl J Med*. DOI: 10.1056/NEJMc2214293

This appendix has been provided by the authors to give readers additional information about the work.

1 **Supplementary Appendix**

2

3 Contents

4

5 Supplemental Methods ..... 2

6 Supplemental Figure S1..... 4

7 Supplemental Figure S2..... 5

8 Supplemental Figure S3..... 6

9 Supplemental Table S1:..... 7

10 Supplemental Table S2:..... 9

11 Supplemental Table S3:.....10

12 Supplemental Table S4:.....11

13 Supplemental Table S5:.....12

14 References .....13

15

16

17

18

19 **Supplemental Methods**  
20

21 **Serum samples.** All samples were collected at Emory University. Collection and processing were  
22 performed under approval from the University Institutional Review Board (#00002061 and  
23 #00058271). Adults  $\geq 18$  years were enrolled who met eligibility criteria under these protocols,  
24 were at least 1 week post-COVID booster vaccination, and provided informed consent. All patient  
25 samples were de-identified prior to inclusion in the study.

26 **Cells and Viruses.** Vero-TMPRSS2 cells were cultured in complete DMEM medium consisting  
27 of 1x DMEM (VWR, #45000-304), 10% FBS, 2mM L-glutamine, and 1x antibiotic as previously  
28 described<sup>1</sup>. nCoV/USA\_WA1/2020 (WA/1), closely resembling the original Wuhan strain, was  
29 propagated from an infectious SARS-CoV-2 clone as previously described<sup>2</sup>. icSARS-CoV-2 was  
30 passed once to generate a working stock. The BA.1 isolate has been previously described (Edara  
31 Cell Reports 2022). Omicron subvariants were isolated from residual nasal swabs: BA.5 isolate  
32 (EPI\_ISL\_13512579), provided by Dr. Richard Webby (St Jude Children's Research Hospital),  
33 BA.2.75.2 (EPI\_ISL\_15146622), BQ.1.1 isolate (EPI\_ISL\_15196219), BA.2.75 isolate  
34 (EPI\_ISL\_14393635), and XBB isolate (EPI\_ISL\_15509864) provided by Dr. Benjamin Pinsky  
35 (Stanford University). All variants were plaque purified and propagated once in VeroE6-TMPRSS2  
36 cells to generate working stocks. Viruses were deep sequenced and confirmed as previously  
37 described<sup>7</sup>.

38 **Focus Reduction Neutralization Assay.** FRNT assays were performed as previously  
39 described<sup>3</sup>. Briefly, samples were diluted at 3-fold in 8 serial dilutions using DMEM in duplicates  
40 with an initial dilution of 1:10 in a total volume of 60  $\mu$ l. Serially diluted samples were incubated  
41 with an equal volume of SARS-CoV-2 (100-200 foci per well) at 37° C for 1 hour in a round-  
42 bottomed 96-well culture plate. The antibody-virus mixture was then added to Vero cells and  
43 incubated at 37° C for 1 hour. Post-incubation, the antibody-virus mixture was removed and 100  
44  $\mu$ l of prewarmed 0.85% methylcellulose overlay was added to each well. Plates were incubated

45 at 37° C for 18 to 40 hours, and the methylcellulose overlay was removed and washed six times  
46 with PBS. Cells were fixed with 2% paraformaldehyde in PBS for 30 minutes. Following fixation,  
47 plates were washed twice with PBS, and permeabilization buffer (0.1% BSA, 0.1% Saponin in  
48 PBS) was added to permeabilize cells for at least 20 minutes. Cells were incubated with an anti-  
49 SARS-CoV spike primary antibody directly conjugated to Alexa Fluor-647 (CR3022-AF647)  
50 overnight at 4°C. Cells were then washed twice with 1x PBS and imaged on an ELISPOT reader  
51 (CTL Analyzer).

52 **Quantification and Statistical Analysis.** Antibody neutralization was quantified by counting the  
53 number of foci for each sample using the Viridot program<sup>4</sup> The neutralization titers were calculated  
54 as follows:  $1 - (\text{ratio of the mean number of foci in the presence of sera and foci at the highest}$   
55  $\text{dilution of the respective sera sample})$ . Each specimen was tested in duplicate. The FRNT-50  
56 titers were interpolated using a 4-parameter nonlinear regression in GraphPad Prism 9.2.0.  
57 Samples that do not neutralize at the limit of detection at 50% are plotted at 20 and used for  
58 geometric mean and fold-change calculations.

59

60

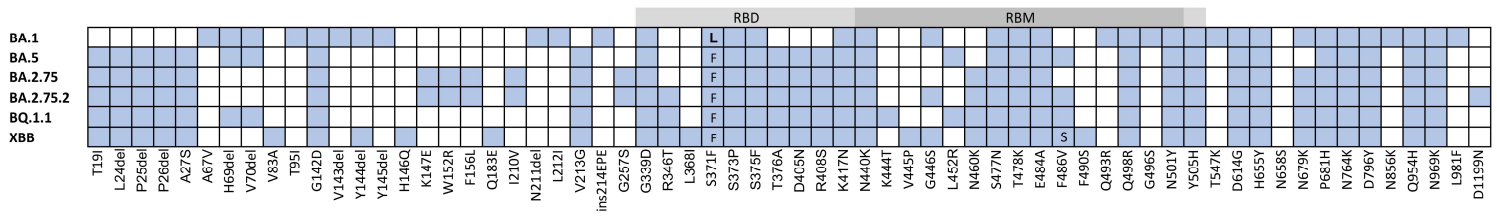

62 **Supplemental Figure S1.** Alignment of Spike protein sequence for variants included in this study.

63 White boxes indicate wild-type sequence, colored box indicates amino acid substitution labeled

64 below. Receptor binding domain (RBD) and receptor binding motif (RBM) are indicated above.

65

## Two Monovalent Boosters- Long Interval

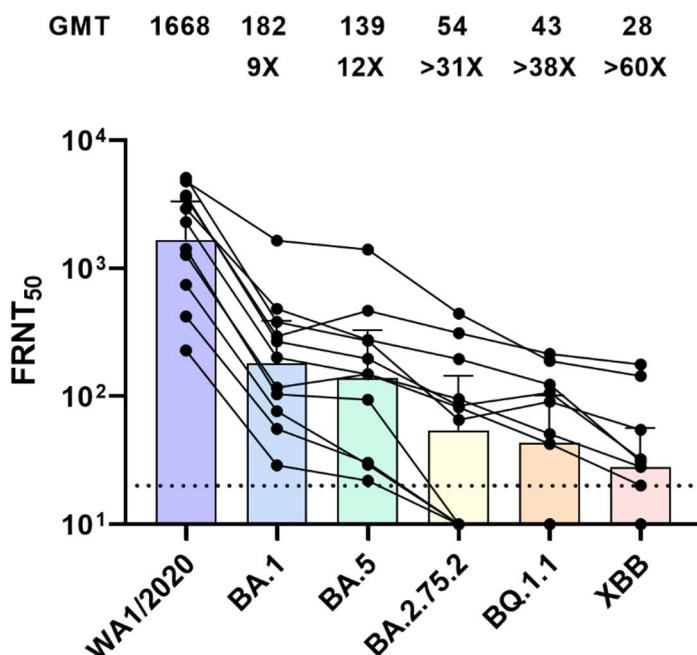

66  
 67 **Supplemental Figure S2. Neutralizing responses against WA1/2020, BA.1, BA.5, BA.2.75.2,**  
 68 **BQ.1.1, and XBB 70-100 days after two monovalent boosters.** Shown is the neutralization  
 69 activity against SARS-CoV-2 variants among 11 individuals who received two monovalent  
 70 boosters 70-100 days prior to sample collection. The focus reduction neutralization test (FRNT<sub>50</sub>  
 71 [the reciprocal dilution of serum that neutralizes 50% of the input virus]) geometric mean titers for  
 72 each variant are shown above each panel along with ratios of GMT compared to WA1/2020. The  
 73 connecting lines between the variants represent matched serum samples. The horizontal lines  
 74 represent the limit of detection of the assay (FRNT<sub>50</sub> GMT 20). Red symbols in panels B and C  
 75 indicate individuals who self-reported prior SARS-CoV-2 infection. The connecting lines represent  
 76 matched samples, colored bars represent geometric mean, error bars represent 95% confidence  
 77 intervals that are not adjusted for multiplicity and may not be used for hypothesis testing.

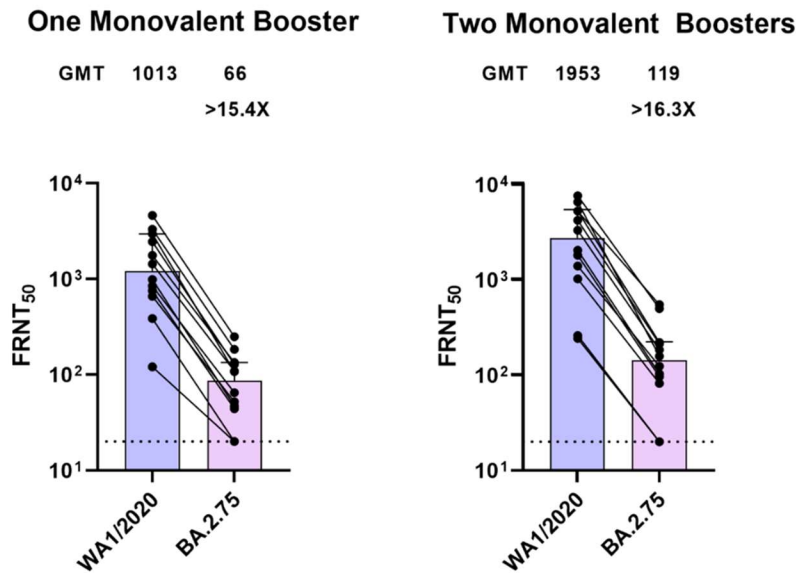

78

79 **Supplemental Figure S3.** Neutralizing responses against WA1/2020 and BA.2.75. Shown is the  
 80 neutralization activity against SARS-CoV-2 variants among 12 individuals who received one  
 81 monovalent booster (Table S2) and 12 individuals who received two monovalent boosters (Table  
 82 S5). The focus reduction neutralization test (FRNT<sub>50</sub> [the reciprocal dilution of serum that  
 83 neutralizes 50% of the input virus]) geometric mean titers for each variant are shown above each  
 84 panel along with ratios of GMT compared to WA1/2020. The connecting lines between the  
 85 variants represent matched serum samples. Colored bars represent geometric mean, error bars  
 86 represent 95% confidence intervals that are not adjusted for multiplicity and may not be used for  
 87 hypothesis testing. The horizontal lines represent the limit of detection of the assay (FRNT<sub>50</sub> GMT  
 88 20).

89

90

91 **Supplemental Table S1:** Amino acid substitutions in spike protein of variants used in the study.

| <b>Variant</b>   | <b>Virus Name</b>                    | <b>GISAID</b>    | <b>Amino Acid Substitutions</b>                                                                                                                                                                                                                                                          |
|------------------|--------------------------------------|------------------|------------------------------------------------------------------------------------------------------------------------------------------------------------------------------------------------------------------------------------------------------------------------------------------|
| <b>BA.1</b>      | hCoV-19/USA/GA-EHC-2811C/2021        | EPI_ISL_7171744  | A67V, H69del, V70del, T95I, G142D, V143del, Y144del, Y145del, N211del, L212I, ins214EPE, S371L, S373P, S375F, G339D, K417N, N440K, G446S, Q493R, Q498R, S477N, T478K, E484A, G496S, N501Y, T547K, Y505H, D614G, H655Y, N679K, P681H, N764K, D796Y, N856K, Q954H, N969K, L981F            |
| <b>BA.5</b>      | hcov-19/USA/MD/HP30386/2022          | EPI_ISL_13512579 | T19I, L24del, P25del, P26del, A27S, H69del, V70del, T76I, G142D, V213G, G339D, S371F, S373P, S375F, T376A, D405N, R408S, K417N, N440K, L452R, S477N, T478K, E484A, F486V, Q498R, N501Y, Y505H, D614G, H655Y, N679K, P681H, N764K, D796Y, Q954H, N969K                                    |
| <b>BA.2.75</b>   | hCoV-19/USA/CA-Stanford-94_S13/2022  | EPI_ISL_14393635 | T19I, L24del, P25del, P26del, A27S, G142D, K147E, W152R, F157L, I210V, V213G, G257S, G339H, S371F, S373P, S375F, T376A, D405N, R408S, K417N, N440K, G446S, N460K, S477N, T478K, E484A, Q498R, N501Y, Y505H, D614G, H655Y, N679K, P681H, N764K, D796Y, Q954H, N969K                       |
| <b>BA.2.75.2</b> | hCoV-19/USA/CA-Stanford-105_S27/2022 | EPI_ISL_15181486 | T19I, L24del, P25del, P26del, A27S, G142D, K147E, W152R, F157L, I210V, V213G, G257S, G339H, R346T, S371F, S373P, S375F, T376A, D405N, R408S, K417N, N440K, G446S, N460K, S477N, T478K, E484A, F486S, Q498R, N501Y, Y505H, D614G, H655Y, N679K, P681H, N764K, D796Y, Q954H, N969K, D1199N |



|               |                                      |                      |                                                                                                                                                                                                                                                                                                  |
|---------------|--------------------------------------|----------------------|--------------------------------------------------------------------------------------------------------------------------------------------------------------------------------------------------------------------------------------------------------------------------------------------------|
| <b>BQ.1.1</b> | hCoV-19/USA/CA-Stanford-106_S04/2022 | EPI_ISL_1519621<br>9 | T19I, L24del, P25del, P26del, A27S, H69del, V70del, G142D, V213G, G339D, R346T, S371F, S373P, S375F, T376A, D405N, R408S, K417N, N440K, K444T, L452R, N460K, S477N, T478K, E484A, F486V, Q498R, N501Y, Y505H, D614G, H655Y, P681H, N679K, N764K, D796Y, Q954H, N969K                             |
| <b>XBB</b>    | hCoV-19/USA/CA-Stanford-109_S21/2022 | EPI_ISL_1550986<br>4 | T19I, L24del, P25del, P26del, A27S, V83A, G142D, Y144del, H146K, Q183E, V213E, G339H, R346T, L368I, S371F, S373P, S375F, T376A, D405N, R408S, K417N, N440K, V445P, G446S, N460K, S477N, T478K, E484A, F486S, F490S, Q498R, N501Y, Y505H, D614G, H655Y, N679K, P681H, N764K, D796Y, Q954H, N969K, |

92

93

94 **Supplemental Table S2:** Demographic information for individuals in single monovalent booster  
95 group in Figure 1A.

| Sample # | Age | Sex    | Exposure status | Vaccine used | Time from vaccination      |
|----------|-----|--------|-----------------|--------------|----------------------------|
| 1        | 40  | Male   | Naive           | Pfizer       | 1 week after booster dose  |
| 2        | 28  | Male   | Naive           | Pfizer       | 4 weeks after booster dose |
| 3        | 33  | Female | Naive           | Pfizer       | 4 weeks after booster dose |
| 4        | 31  | Female | Naive           | Pfizer       | 4 weeks after booster dose |
| 5        | 29  | Female | Naive           | Pfizer       | 4 weeks after booster dose |
| 6        | 54  | Male   | Naive           | Pfizer       | 4 weeks after booster dose |
| 7        | 51  | Male   | Naive           | Moderna      | 4 weeks after booster dose |
| 8        | 26  | Female | Naive           | Moderna      | 4 weeks after booster dose |
| 9        | 27  | Male   | Naive           | Pfizer       | 1 week after booster dose  |
| 10       | 26  | Female | Naive           | Moderna      | 4 weeks after booster dose |
| 11       | 33  | Female | Naive           | Moderna      | 1 week after booster dose  |
| 12       | 27  | Female | Naive           | Pfizer       | 1 week after booster dose  |

96

97

98 **Supplemental Table S3:** Demographic information for double monovalent booster group in  
 99 Figure 1B.

| Sample # | Age | Sex    | Exposure status | Vaccine used | Time from vaccination                 |
|----------|-----|--------|-----------------|--------------|---------------------------------------|
| 13       | 59  | Male   | Naïve           | Pfizer       | 14 days after 2 <sup>nd</sup> booster |
| 14       | 64  | Female | Naïve           | Pfizer       | 32 days after 2 <sup>nd</sup> booster |
| 15       | 47  | Female | Naïve           | Moderna      | 33 days after 2 <sup>nd</sup> booster |
| 16       | 43  | Male   | Naïve           | NA           | 42 days after 2 <sup>nd</sup> booster |
| 17       | 41  | Female | Naïve           | Moderna      | 30 days after 2 <sup>nd</sup> booster |
| 18       | 35  | Male   | Recovered       | Moderna      | 31 days after 2 <sup>nd</sup> booster |
| 19       | 21  | Female | Recovered       | Moderna      | 6 days after 2 <sup>nd</sup> booster  |
| 20       | 59  | Female | Recovered       | Moderna      | 30 days after 2 <sup>nd</sup> booster |
| 21       | 58  | Female | Naïve           | Moderna      | 12 days after 2 <sup>nd</sup> booster |
| 22       | 62  | Male   | Naïve           | Pfizer       | 54 days after 2 <sup>nd</sup> booster |
| 23       | 59  | Female | Naïve           | Pfizer       | 57 days after 2 <sup>nd</sup> booster |

100

101 NA: Data not available

102

103 **Supplemental Table S4:** Demographic information for bivalent booster group in Figure 1C.

| Sample # | Age | Sex | Exposure status | Vaccine used | Time from vaccination |
|----------|-----|-----|-----------------|--------------|-----------------------|
| 24*      | 70  | F   | Naïve           | Moderna      | 20 days after booster |
| 24       | 47  | M   | Naïve           | NA           | 20 days after booster |
| 25       | 46  | F   | Naïve           | Moderna      | 17 days after booster |
| 26       | 41  | F   | Naïve           | NA           | 21 days after booster |
| 27       | 36  | F   | Naïve           | Pfizer       | 17 days after booster |
| 28       | 34  | F   | Naïve           | Moderna      | 16 days after booster |
| 29       | 46  | F   | Recovered       | NA           | 28 days after booster |
| 30       | 38  | M   | Naïve           | NA           | 19 days after booster |
| 31**     | 23  | M   | Naïve           | NA           | 16 days after booster |
| 32       | 32  | M   | Naïve           | NA           | 17 days after booster |
| 33       | 33  | F   | Naïve           | NA           | 42 days after booster |
| 34       | 40  | M   | Recovered       | NA           | 36 days after booster |

104

105 NA: Data not available

106 \*This individual received two monovalent boosters prior to bivalent booster.

107 \*\*This individual received a primary vaccination of Johnson and Johnson followed by one  
 108 monovalent booster and one bivalent booster.

109

110 **Supplemental Table S5:** Demographic information for double monovalent booster group with  
 111 longer interval since vaccination in Supplemental Figure 2.

| Sample # | Age | Sex    | Exposure status | Vaccine used | Time from vaccination                  |
|----------|-----|--------|-----------------|--------------|----------------------------------------|
| 35       | 68  | Female | Naïve           | Moderna      | 100 days after 2 <sup>nd</sup> booster |
| 36       | 72  | Female | Naïve           | Moderna      | 92 days after 2 <sup>nd</sup> booster  |
| 37       | 69  | Male   | Naïve           | Moderna      | 92 days after 2 <sup>nd</sup> booster  |
| 38       | 72  | Female | Naïve           | Moderna      | 73 days after 2 <sup>nd</sup> booster  |
| 39       | 60  | Female | Naïve           | Moderna      | 100 days after 2 <sup>nd</sup> booster |
| 40       | 64  | Male   | Naïve           | Moderna      | 83 days after 2 <sup>nd</sup> booster  |
| 41       | 71  | Male   | Naïve           | Moderna      | 70 days after 2 <sup>nd</sup> booster  |
| 43       | 60  | Male   | Naïve           | Moderna      | 71 days after 2 <sup>nd</sup> booster  |
| 43       | 67  | Female | Naïve           | Moderna      | 71 days after 2 <sup>nd</sup> booster  |
| 44       | 70  | Female | Naïve           | Moderna      | 104 days after 2 <sup>nd</sup> booster |
| 45       | 73  | Male   | Naïve           | Moderna      | 74 days after 2 <sup>nd</sup> booster  |

112

113

114 **References**

115

116 1. Edara VV, Norwood C, Floyd K, et al. Infection- and vaccine-induced antibody binding and  
117 neutralization of the B.1.351 SARS-CoV-2 variant. *Cell Host Microbe* 2021;29:516-21.e3.

118 2. Xie X, Muruato A, Lokugamage KG, et al. An Infectious cDNA Clone of SARS-CoV-2. *Cell*  
119 *Host Microbe* 2020;27:841-8.e3.

120 3. Vanderheiden A, Edara VV, Floyd K, et al. Development of a Rapid Focus Reduction  
121 Neutralization Test Assay for Measuring SARS-CoV-2 Neutralizing Antibodies. *Curr Protoc*  
122 *Immunol* 2020;131:e116.

123 4. Katzelnick LC, Coello Escoto A, McElvany BD, et al. Viridot: An automated virus plaque  
124 (immunofocus) counter for the measurement of serological neutralizing responses with  
125 application to dengue virus. *PLoS Negl Trop Dis* 2018;12:e0006862.

126
