# Supplementary material
Source: PubMed Central journal article supplement (PMC9812288)
Supplement: NEJMc2214293_disclosures.pdf [file NEJMc2214293_disclosures.pdf]

Daniel Douek

**Discloser Identifier:** 375483

**Disclosure Purpose:** 22-14293

## Summary of Interests

I do not have any interests to disclose at this time.

## Additional Questions

1. **Are there other relationships or activities that readers could perceive to have influenced, or that give the appearance of potentially influencing, what you wrote in the submitted work?**

No.

2. **What is the manuscript title?**

Enhanced Neutralization against BA.2.75.2, BQ.1.1, and XBB from mRNA Bivalent Booster

3. **Are you the corresponding author?**

No.

## Certification

I certify that the information provided in this disclosure is complete and accurate.

Meredith Gardner

**Discloser Identifier:** 1022141

**Disclosure Purpose:** 22-14293

## Summary of Interests

I do not have any interests to disclose at this time.

## Additional Questions

1. **Are there other relationships or activities that readers could perceive to have influenced, or that give the appearance of potentially influencing, what you wrote in the submitted work?**

No.

2. **What is the manuscript title?**

Enhanced Neutralization against BA.2.75.2, BQ.1.1, and XBB from mRNA Bivalent Booster

3. **Are you the corresponding author?**

No.

## Certification

I certify that the information provided in this disclosure is complete and accurate.

**Discloser Identifier:** 1101774

**Disclosure Purpose:** 22-14293

## Summary of Interests

I do not have any interests to disclose at this time.

## Additional Questions

1. **Are there other relationships or activities that readers could perceive to have influenced, or that give the appearance of potentially influencing, what you wrote in the submitted work?**

No.

2. **What is the manuscript title?**

Enhanced Neutralization against BA.2.75.2, BQ.1.1, and XBB from mRNA Bivalent Booster

3. **Are you the corresponding author?**

No.

## Certification

I certify that the information provided in this disclosure is complete and accurate.

**Discloser Identifier:** 1051417

**Disclosure Purpose:** 22-14293

## Summary of Interests

I do not have any interests to disclose at this time.

## Additional Questions

1. **Are there other relationships or activities that readers could perceive to have influenced, or that give the appearance of potentially influencing, what you wrote in the submitted work?**

No.

2. **What is the manuscript title?**

Enhanced Neutralization against BA.2.75.2, BQ.1.1, and XBB from mRNA Bivalent Booster

3. **Are you the corresponding author?**

No.

## Certification

I certify that the information provided in this disclosure is complete and accurate.

**Discloser Identifier:** 996746

**Disclosure Purpose:** 22-14293

## Summary of Interests

I do not have any interests to disclose at this time.

## Additional Questions

1. **Are there other relationships or activities that readers could perceive to have influenced, or that give the appearance of potentially influencing, what you wrote in the submitted work?**

No.

2. **What is the manuscript title?**

Enhanced Neutralization against BA.2.75.2, BQ.1.1, and XBB from mRNA Bivalent Booster

3. **Are you the corresponding author?**

No.

## Certification

I certify that the information provided in this disclosure is complete and accurate.

FRANCES Lee

**Discloser Identifier:** 984470

**Disclosure Purpose:** 22-14293

## Summary of Interests

I do not have any interests to disclose at this time.

## Additional Questions

1. **Are there other relationships or activities that readers could perceive to have influenced, or that give the appearance of potentially influencing, what you wrote in the submitted work?**

No.

2. **What is the manuscript title?**

Enhanced Neutralization against BA.2.75.2, BQ.1.1, and XBB from mRNA Bivalent Booster

3. **Are you the corresponding author?**

No.

## Certification

I certify that the information provided in this disclosure is complete and accurate.

Matthew Lee

**Discloser Identifier:** 1101773

**Disclosure Purpose:** 22-14293

## Summary of Interests

I do not have any interests to disclose at this time.

## Additional Questions

1. **Are there other relationships or activities that readers could perceive to have influenced, or that give the appearance of potentially influencing, what you wrote in the submitted work?**

No.

2. **What is the manuscript title?**

Enhanced Neutralization against BA.2.75.2, BQ.1.1, and XBB from mRNA Bivalent Booster

3. **Are you the corresponding author?**

No.

## Certification

I certify that the information provided in this disclosure is complete and accurate.

**Discloser Identifier:** 1103908

**Disclosure Purpose:** 22-14293

## Summary of Interests

I do not have any interests to disclose at this time.

## Additional Questions

1. **Are there other relationships or activities that readers could perceive to have influenced, or that give the appearance of potentially influencing, what you wrote in the submitted work?**

No.

2. **What is the manuscript title?**

Enhanced Neutralization against BA.2.75.2, BQ.1.1, and XBB from mRNA Bivalent Booster

3. **Are you the corresponding author?**

No.

## Certification

I certify that the information provided in this disclosure is complete and accurate.



**Discloser Identifier:** 1101776

**Disclosure Purpose:** 22-14293

## Summary of Interests

I do not have any interests to disclose at this time.

## Additional Questions

1. **Are there other relationships or activities that readers could perceive to have influenced, or that give the appearance of potentially influencing, what you wrote in the submitted work?**

No.

2. **What is the manuscript title?**

Enhanced Neutralization against BA.2.75.2, BQ.1.1, and XBB from mRNA Bivalent Booster

3. **Are you the corresponding author?**

No.

## Certification

I certify that the information provided in this disclosure is complete and accurate.

**Discloser Identifier:** 984432

**Disclosure Purpose:** 22-14293

## Summary of Interests

I do not have any interests to disclose at this time.

## Additional Questions

1. **Are there other relationships or activities that readers could perceive to have influenced, or that give the appearance of potentially influencing, what you wrote in the submitted work?**

No.

2. **What is the manuscript title?**

Enhanced Neutralization against BA.2.75.2, BQ.1.1, and XBB from mRNA Bivalent Booster

3. **Are you the corresponding author?**

No.

## Certification

I certify that the information provided in this disclosure is complete and accurate.

**Discloser Identifier:** 382909

**Disclosure Purpose:** 22-14293

## Summary of Interests

I do not have any interests to disclose at this time.

## Additional Questions

1. **Are there other relationships or activities that readers could perceive to have influenced, or that give the appearance of potentially influencing, what you wrote in the submitted work?**

No.

2. **What is the manuscript title?**

Enhanced Neutralization against BA.2.75.2, BQ.1.1, and XBB from mRNA Bivalent Booster

3. **Are you the corresponding author?**

No.

## Certification

I certify that the information provided in this disclosure is complete and accurate.

Discloser Identifier: 325572

Disclosure Purpose: 22-14293

## Summary of Interests

### Company or Organization

| Entity                                                                                                                                                            | Type             | Interest Held By |
|-------------------------------------------------------------------------------------------------------------------------------------------------------------------|------------------|------------------|
| Foundation for the National Institutes of Health                                                                                                                  | Grant / Contract | Self             |
| <i>Recipient Name:</i> Nadine Rouphael<br><i>Grant / Contract Description:</i> VTEU- HIPC- T32 and R38<br><i>Additional Information:</i>                          |                  |                  |
| <i>Recipient Type:</i> Institution<br><i>Grant / Contract Purpose:</i> Research                                                                                   |                  |                  |
| Laboratorios Pfizer Ltda.                                                                                                                                         | Grant / Contract | Self             |
| <i>Recipient Name:</i> Nadine Rouphael<br><i>Grant / Contract Description:</i> Clinical Study<br><i>Additional Information:</i>                                   |                  |                  |
| <i>Recipient Type:</i> Institution<br><i>Grant / Contract Purpose:</i> Research                                                                                   |                  |                  |
| Merck                                                                                                                                                             | Grant / Contract | Self             |
| <i>Recipient Name:</i> Emory<br><i>Grant / Contract Description:</i> Clinical Study<br><i>Additional Information:</i> Research on pneumococcal epidemiology       |                  |                  |
| <i>Recipient Type:</i> Institution<br><i>Grant / Contract Purpose:</i> Research                                                                                   |                  |                  |
| National Institutes of Health                                                                                                                                     | Grant / Contract | Self             |
| <i>Recipient Name:</i> Emory<br><i>Grant / Contract Description:</i> 5UM1AI148576-02<br><i>Additional Information:</i> COVID-19 vaccines and therapeutics studies |                  |                  |
| <i>Recipient Type:</i> Institution<br><i>Grant / Contract Purpose:</i> Research                                                                                   |                  |                  |
| SANOPI PASTEUR INC.                                                                                                                                               | Grant / Contract | Self             |
| <i>Recipient Name:</i> Emory<br><i>Grant / Contract Description:</i> Clinical studies<br><i>Additional Information:</i> On COVID-19 and C diff vaccines           |                  |                  |
| <i>Recipient Type:</i> Institution<br><i>Grant / Contract Purpose:</i> Research                                                                                   |                  |                  |

## Additional Questions

1. Are there other relationships or activities that readers could perceive to have influenced, or that give the appearance of potentially influencing, what you wrote in the submitted work?

No.

2. What is the manuscript title?

Enhanced Neutralization against BA.2.75.2, BQ.1.1, and XBB from mRNA Bivalent Booster

3. Are you the corresponding author?

No.

## Certification

I certify that the information provided in this disclosure is complete and accurate.

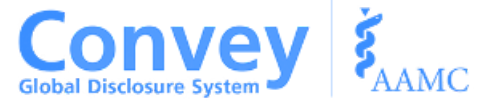

Hady Samaha

**Discloser Identifier:** 1087238

**Disclosure Purpose:** 22-14293

## Summary of Interests

I do not have any interests to disclose at this time.

## Additional Questions

1. **Are there other relationships or activities that readers could perceive to have influenced, or that give the appearance of potentially influencing, what you wrote in the submitted work?**

No.

2. **What is the manuscript title?**

Enhanced Neutralization against BA.2.75.2, BQ.1.1, and XBB from mRNA Bivalent Booster

3. **Are you the corresponding author?**

No.

## Certification

I certify that the information provided in this disclosure is complete and accurate.

Daniel Solis

**Discloser Identifier:** 1019433

**Disclosure Purpose:** 22-14293

## Summary of Interests

I do not have any interests to disclose at this time.

## Additional Questions

1. **Are there other relationships or activities that readers could perceive to have influenced, or that give the appearance of potentially influencing, what you wrote in the submitted work?**

No.

2. **What is the manuscript title?**

Enhanced Neutralization against BA.2.75.2, BQ.1.1, and XBB from mRNA Bivalent Booster

3. **Are you the corresponding author?**

No.

## Certification

I certify that the information provided in this disclosure is complete and accurate.

Discloser Identifier: 942851

Disclosure Purpose: 22-14293

## Summary of Interests

### Company or Organization

| Entity                                                                                                                                                                     | Type       | Interest Held By |
|----------------------------------------------------------------------------------------------------------------------------------------------------------------------------|------------|------------------|
| ModernaTX                                                                                                                                                                  | Consultant | Self             |
| <i>Category:</i> Consultant<br><i>Description:</i> Consultation service to ModernaTX on the Epidemiology COVID-19 Variant Advisory Board<br><i>Additional Information:</i> |            |                  |
| Ocugen                                                                                                                                                                     | Consultant | Self             |
| <i>Category:</i> Consultant<br><i>Description:</i> I serve in an advisory role for Ocugen<br><i>Additional Information:</i>                                                |            |                  |

## Additional Questions

1. **Are there other relationships or activities that readers could perceive to have influenced, or that give the appearance of potentially influencing, what you wrote in the submitted work?**

No.

2. **What is the manuscript title?**

Enhanced Neutralization against BA.2.75.2, BQ.1.1, and XBB from mRNA Bivalent Booster

3. **Are you the corresponding author?**

Yes.

a. **Please list the other authors' names here.**

Meredith E. Davis-Gardner, Ph.D.1, Lilin Lai, M.D.1, Bushra Wali, Ph.D.1, Hady Samaha, M.D.1, Daniel Solis, B.S.2, Matthew Lee, M.S.1, Andrea Porter-Morrison, B.S.1, Ian Thomas Hentenaar, M.S.1, Fumiko Yamamoto, Ph.D.2, Sucheta Godbole, M.S.3, Yuan Li, Ph.D., M.S.,1 Daniel C. Douek, M.D., Ph.D.3, Frances Eun-Hyung Lee, M.D.,1, Nadine Roupheal, M.D.1, Alberto Moreno, M.D.1, Benjamin A. Pinsky, M.D., Ph.D.2, Mehul S. Suthar, Ph.D.1\*

## Certification

I certify that the information provided in this disclosure is complete and accurate.





**Discloser Identifier:** 1101777

**Disclosure Purpose:** 22-14293

## Summary of Interests

I do not have any interests to disclose at this time.

## Additional Questions

1. **Are there other relationships or activities that readers could perceive to have influenced, or that give the appearance of potentially influencing, what you wrote in the submitted work?**

No.

2. **What is the manuscript title?**

Enhanced Neutralization against BA.2.75.2, BQ.1.1, and XBB from mRNA Bivalent Booster

3. **Are you the corresponding author?**

No.

## Certification

I certify that the information provided in this disclosure is complete and accurate.

**Discloser Identifier:** 923793

**Disclosure Purpose:** 22-14293

## Summary of Interests

I do not have any interests to disclose at this time.

## Additional Questions

1. **Are there other relationships or activities that readers could perceive to have influenced, or that give the appearance of potentially influencing, what you wrote in the submitted work?**

No.

2. **What is the manuscript title?**

Enhanced Neutralization against BA.2.75.2, BQ.1.1, and XBB from mRNA Bivalent Booster

3. **Are you the corresponding author?**

No.

## Certification

I certify that the information provided in this disclosure is complete and accurate.
